# Supplementary material for: Fitting of Growth Curves and Estimation of Genetic Relationship between Growth Parameters of Qianhua Mutton Merino
Source: MDPI journal article supplement (doi:10.3390/genes15030390), 2024-03-21
Supplement: s1 [file s1]

## Supplementary material

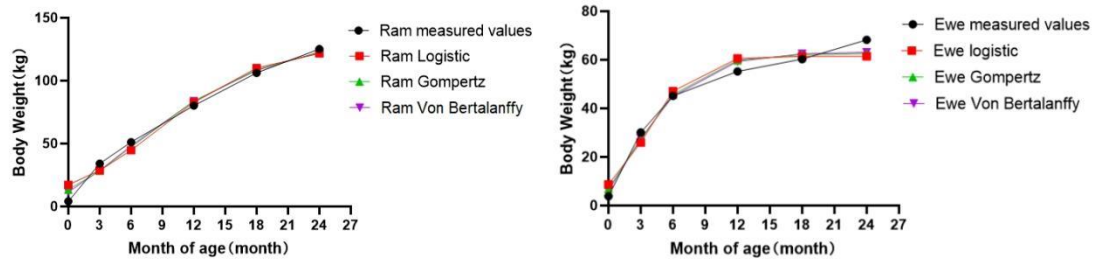

**Figure S1.** Cumulative growth curve of measured body weight and estimated weight of rams and ewes according to the models.

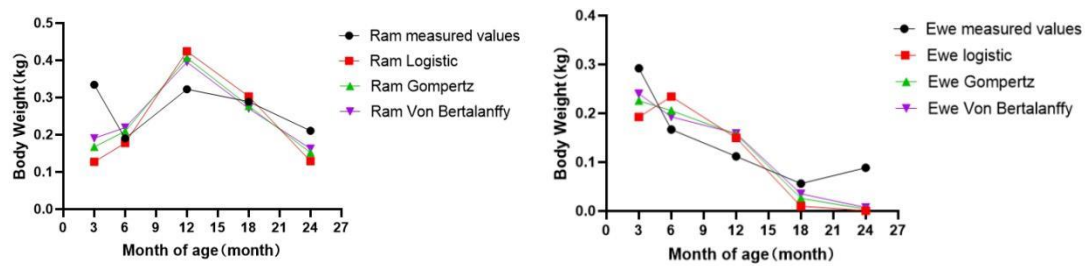

**Figure S2.** Absolute growth curve of measured body weight and estimated weight of rams and ewes according to the models.

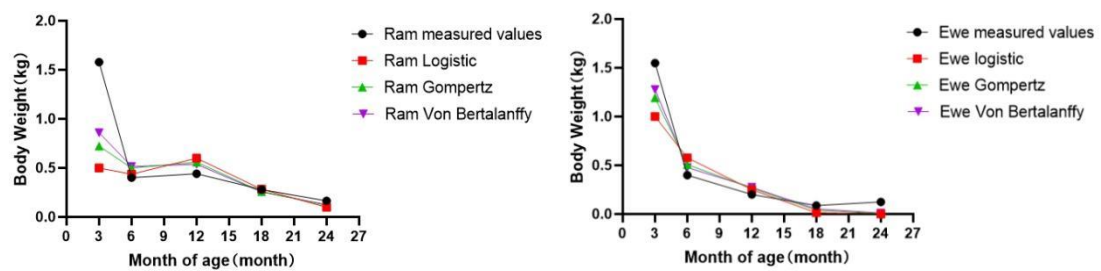

**Figure S3.** Relative growth curve of measured body weight and estimated weight of rams and ewes according to the models.

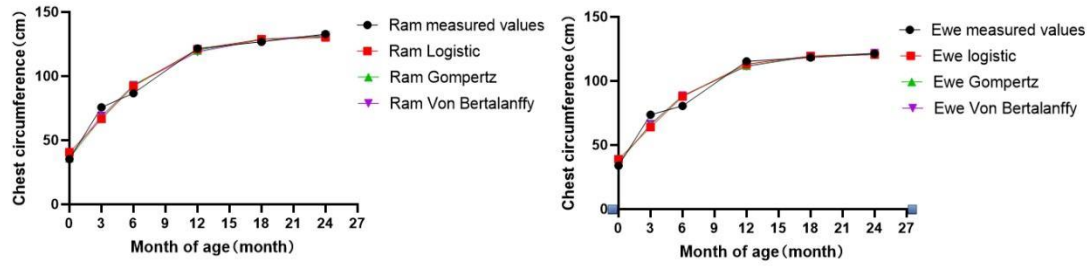

**Figure S4.** Cumulative growth curve of measured chest circumference and estimated chest circumference of rams and ewes according to the models.

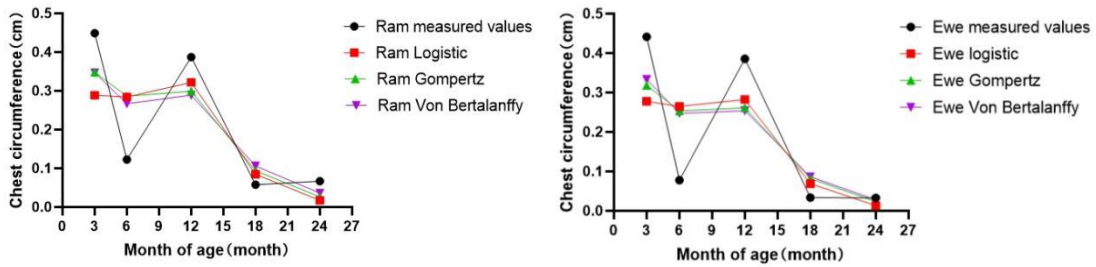

**Figure S5.** Absolute growth curve of measured chest circumference and estimated chest circumference of rams and ewes according to the models.

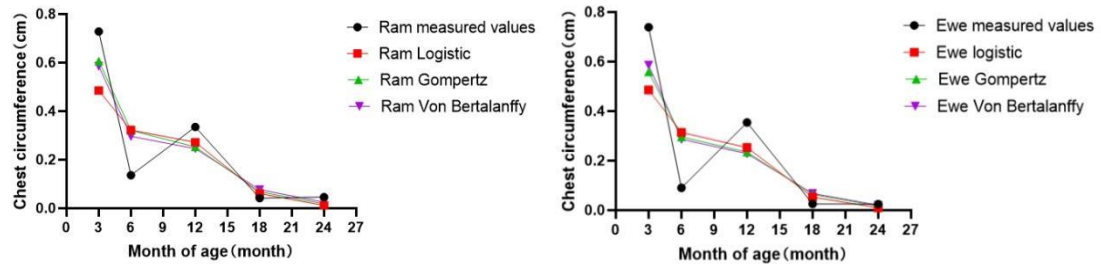

**Figure S6.** Relative growth curve of measured chest circumference and estimated chest circumference of rams and ewes according to the models.

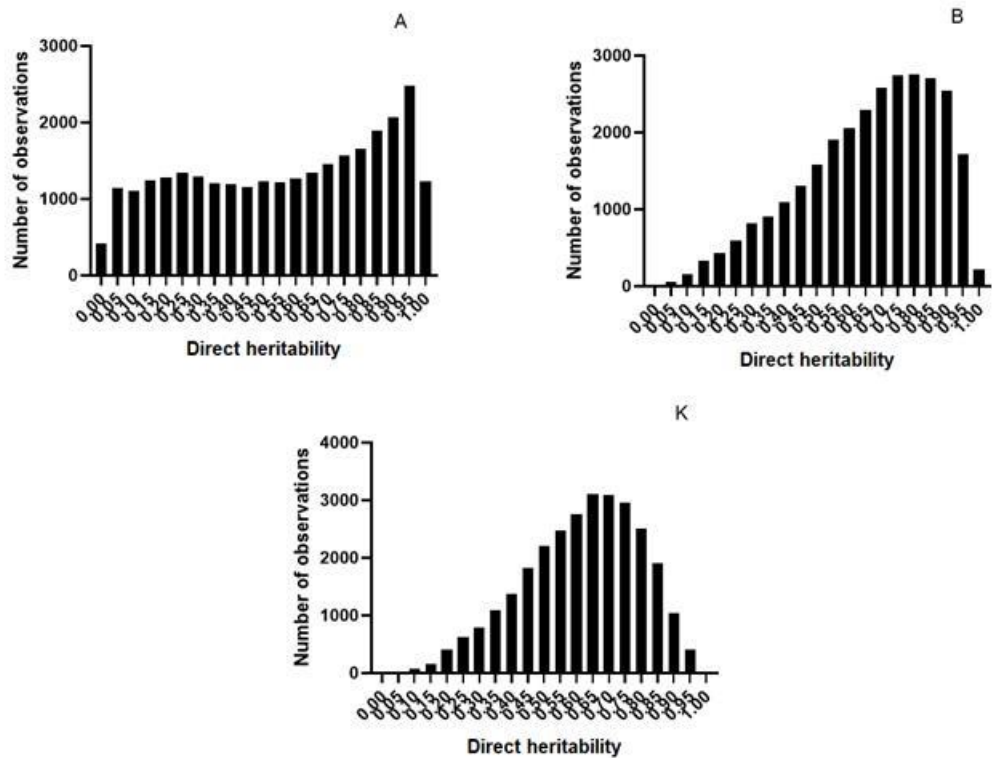

**Figure S7.** Posterior distribution of the direct heritabilities for A, B, and K growth curve parameters of weight.

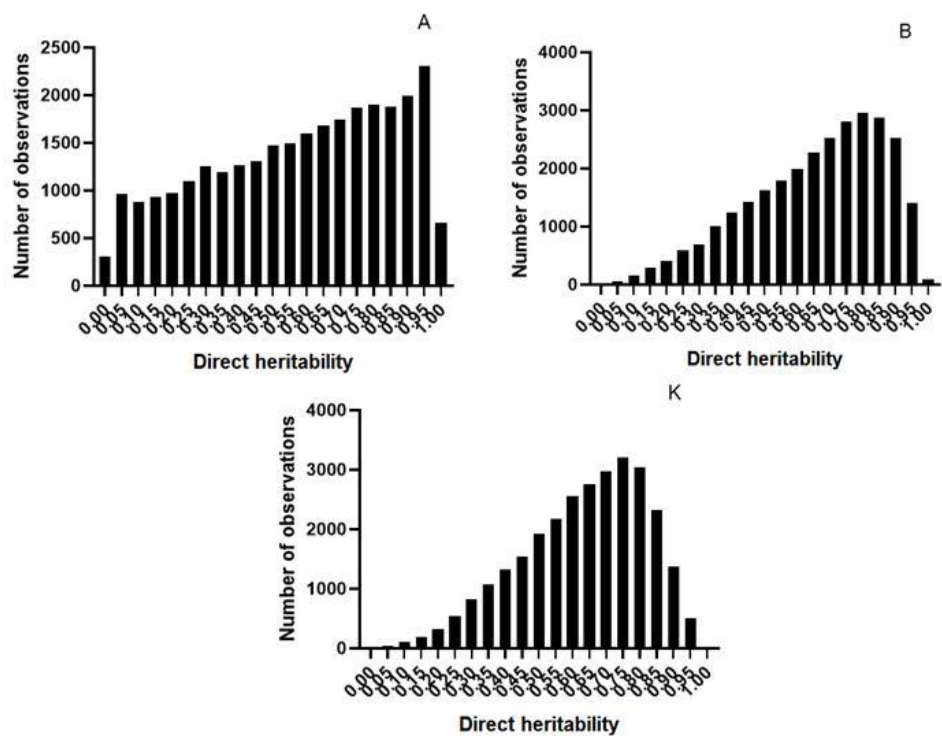

**Figure S8.** Posterior distribution of the direct heritabilities for A, B, and K growth curve parameters of chest circumference.

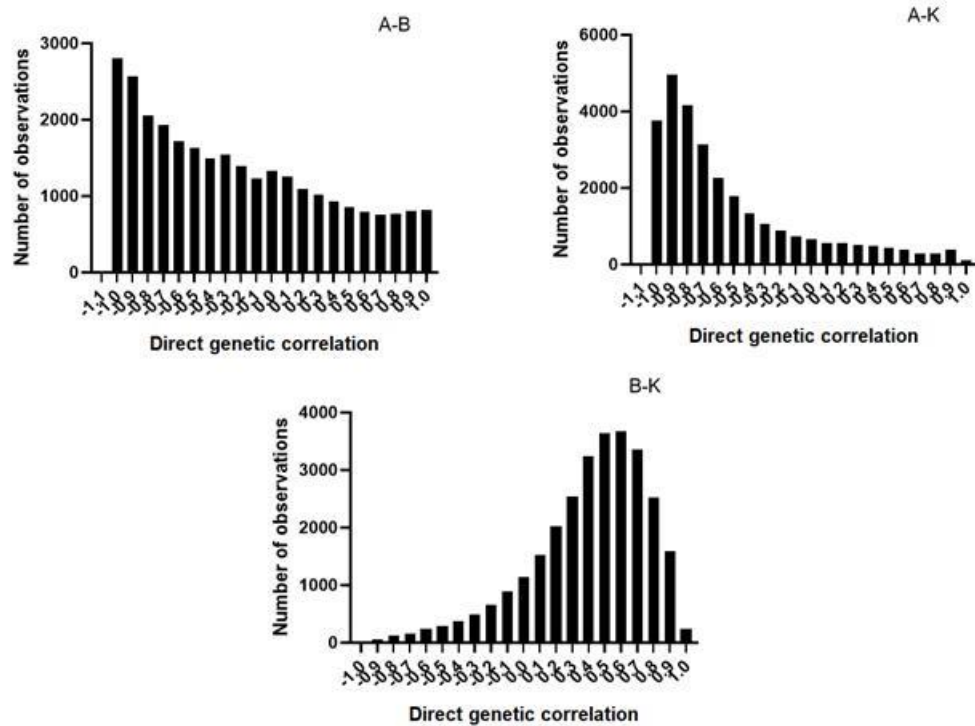

**Figure S9.** Posterior distribution of direct genetic correlations between growth curve parameters of weight (A-B, A-K, and B-K).

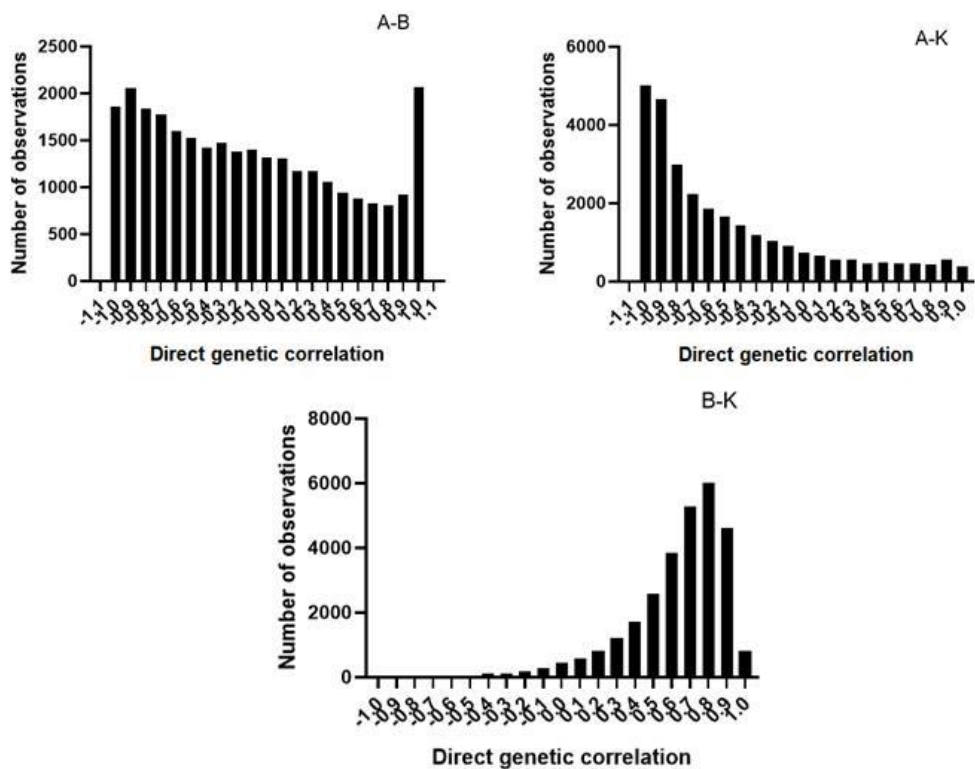

**Figure S10.** Posterior distribution of direct genetic correlations b
